# Supplementary material for: Heteroatom-doped carbon materials with interconnected channels as ultrastable anodes for lithium/sodium ion batteries
Source: Royal Society of Chemistry journal article supplement (doi:10.1039/d1dt00243k), 2021-01-01
Supplement: d1dt00243k1.pdf [file d1dt00243k1.pdf]

# **Heteroatoms-doped carbon materials with interconnected channels as ultrastable anodes for lithium/sodium ion batteries**

Zhiqiang Li,<sup>a,b</sup> Le Cai,<sup>a,b</sup> Kainian Chu,<sup>a,b</sup> Shikai Xu,<sup>a,b</sup> Ge Yao,<sup>a,b</sup> Lingzhi Wei<sup>a,b</sup> and Fangcai Zheng<sup>\*a,b</sup>

<sup>a</sup> Institutes of Physical Science and Information Technology, Anhui University, Hefei 230601, China

<sup>b</sup> Key Laboratory of Structure and Functional Regulation of Hybrid Materials, Anhui University, Ministry of Education, Hefei 230601, China

---

\* zfc@mail.ustc.edu.cn. Z. Q. Li and L. Cai are co-first authors for this work.

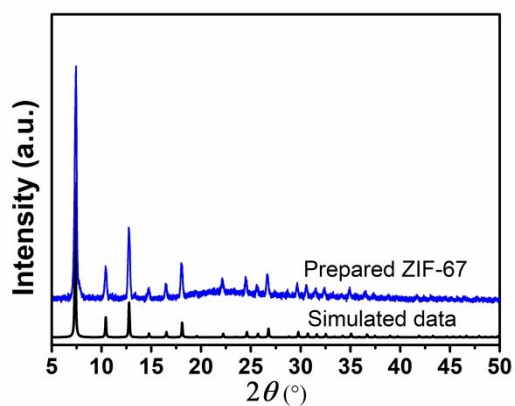

**Figure S1.** Experimental and simulated XRD patterns of as-prepared ZIF-67 polyhedrons.

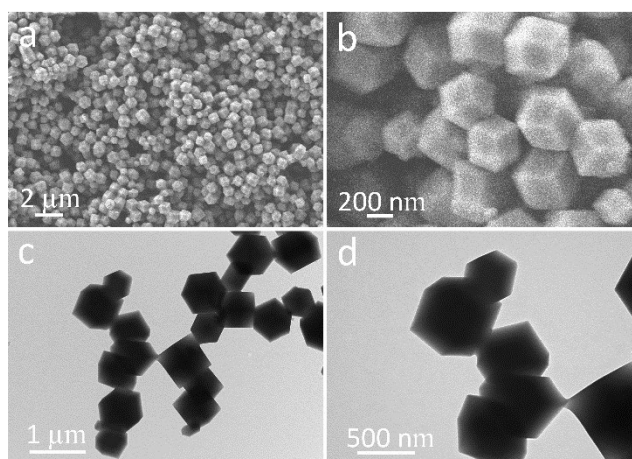

**Figure S2.** (a, b) SEM and (c, d) TEM images of as-prepared ZIF-67 polyhedrons.

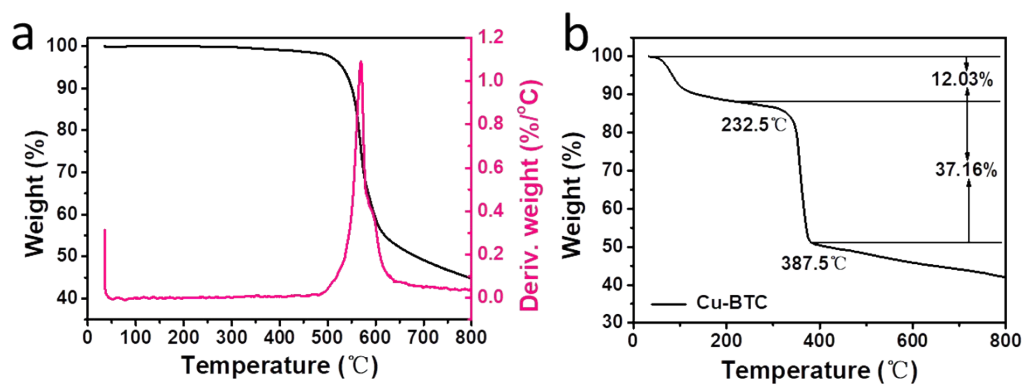

**Figure S3.** TGA curves of as-prepared (a) ZIF-67 polyhedrons and (b) Cu-BTC in N<sub>2</sub>.

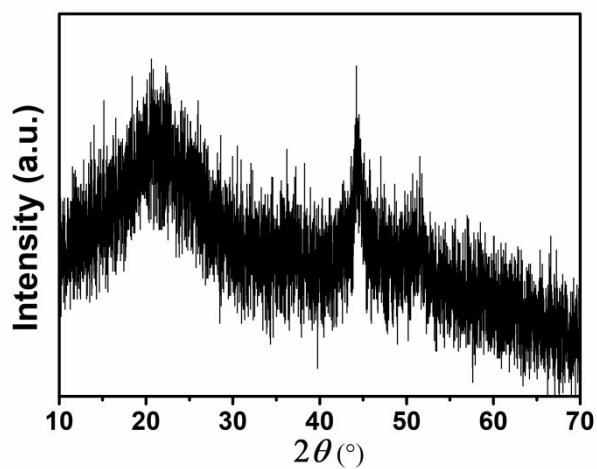

**Figure S4.** XRD pattern of Co nanoparticles embedded in simultaneously generated carbon matrix.

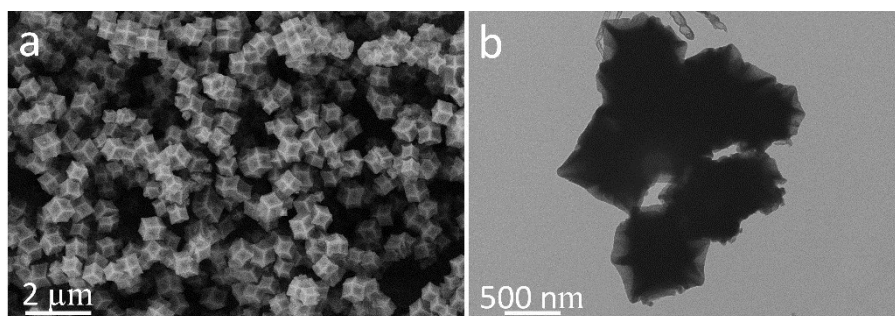

**Figure S5.** (a) SEM and (b) TEM images of Co nanoparticles embedded in simultaneously generated carbon matrix.

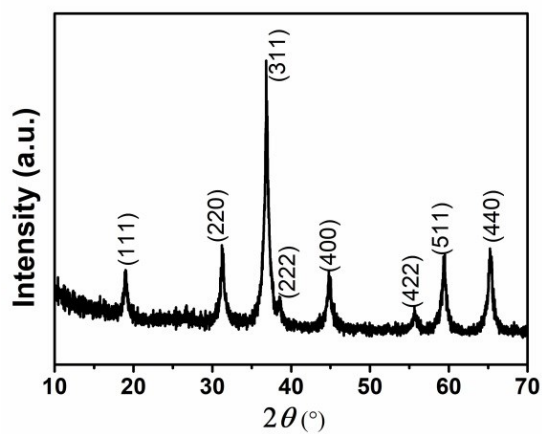

**Figure S6.** XRD pattern of  $\text{Co}_3\text{O}_4$  nanoparticles embedded in porous carbon matrix.

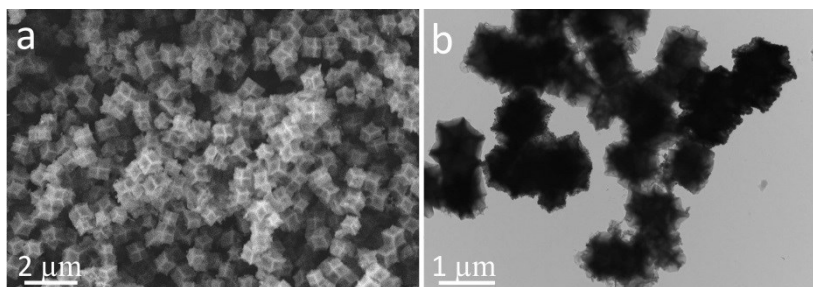

**Figure S7.** (a) SEM and (b) TEM images of  $\text{Co}_3\text{O}_4$  nanoparticles embedded in porous carbon matrix.

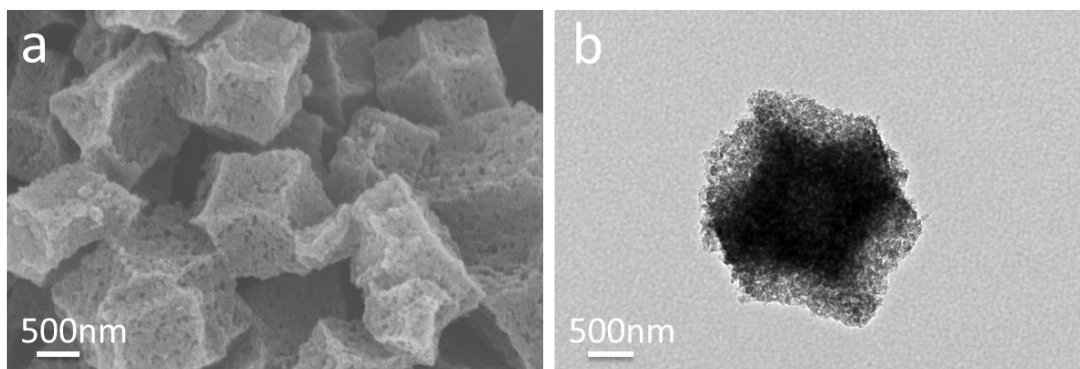

**Figure S8.** (a) SEM and (b) TEM images of NOPCP-700.

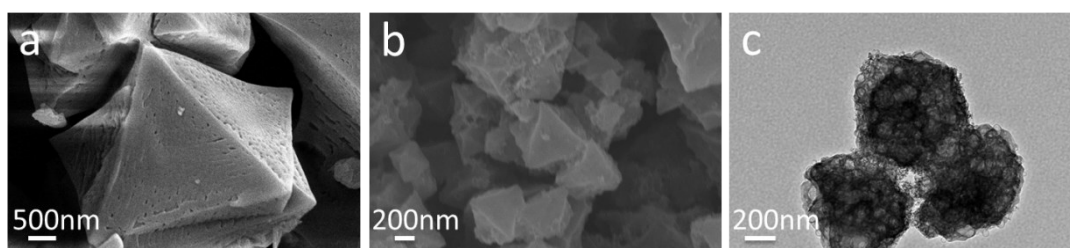

**Figure S9.** SEM images of (a) Cu-BTC and (b) PCP, (c) TEM image of PCP.

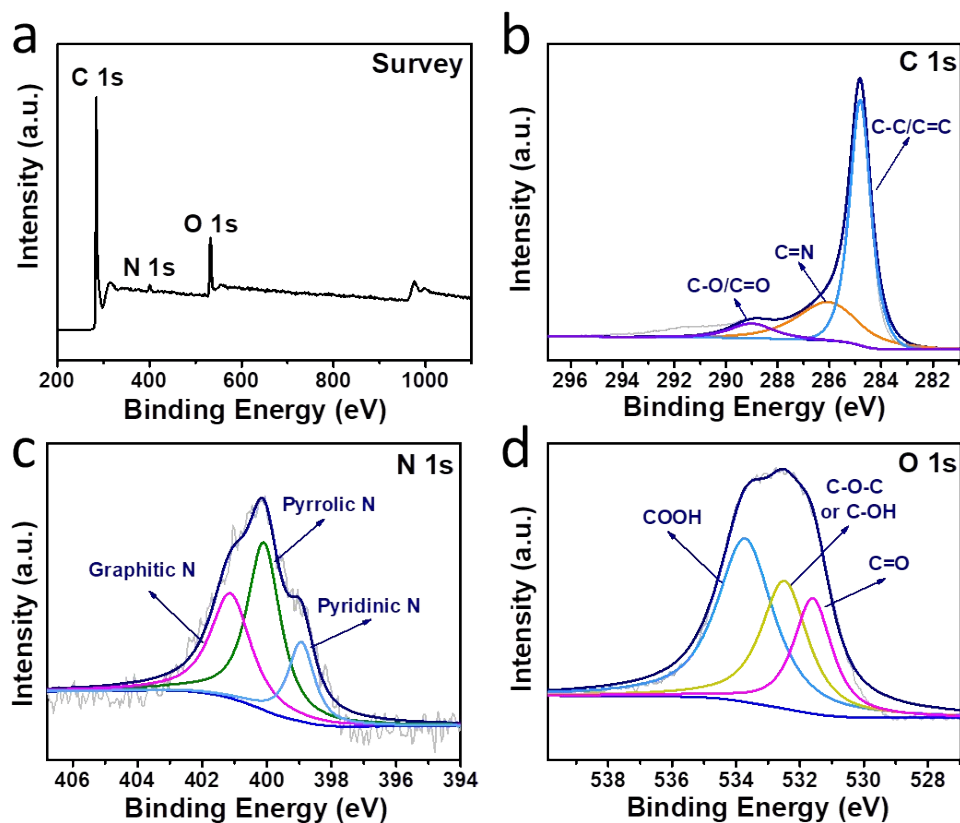

**Figure S10.** (a) Survey XPS spectrum, and high-resolution XPS spectra of (c) C 1s, (c) N 1s, and (d) O 1s for NOPCP-700.

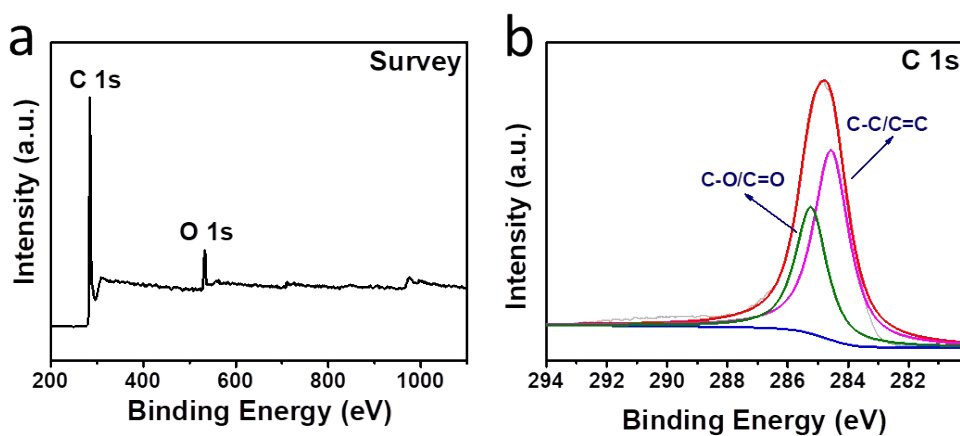

**Figure S11.** (a) Survey XPS spectrum, and (b) high-resolution XPS spectra of C 1s for PCP.

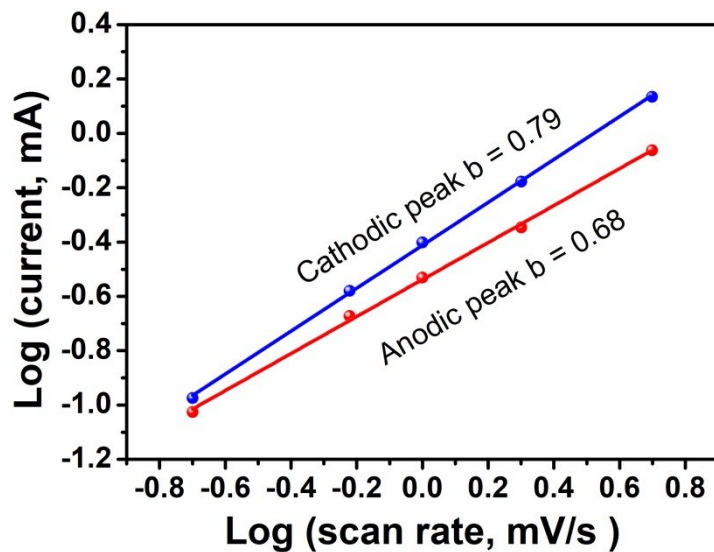

Figure S12. The b-value determination of NOPCP-600 for LIBs.

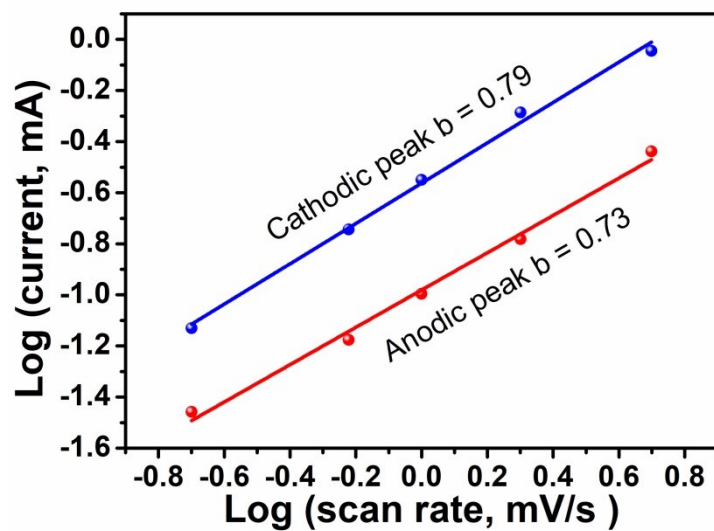

Figure S13. The b-value determination of NOPCP-600 for SIBs.

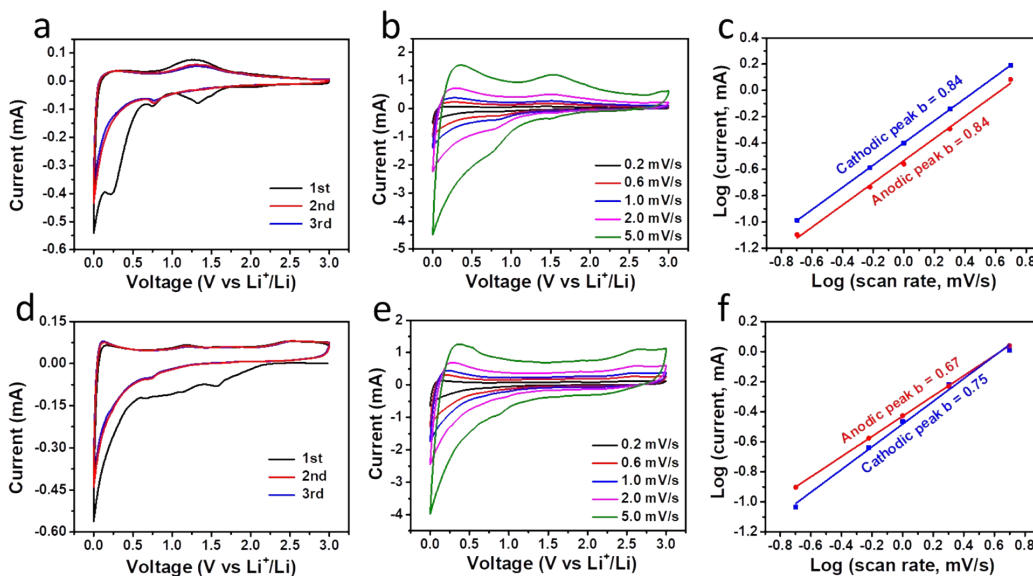

**Figure S14.** Electrochemical kinetic analysis of PCP and NOPCP-700 in LIBs (a and d) CV curves over a voltage range of 0.01-3.0 V at a scan rate of  $0.1 \text{ mV s}^{-1}$ , (b and e) CV curves at various scan rate, (c and f) the b-value determination for LIBs.

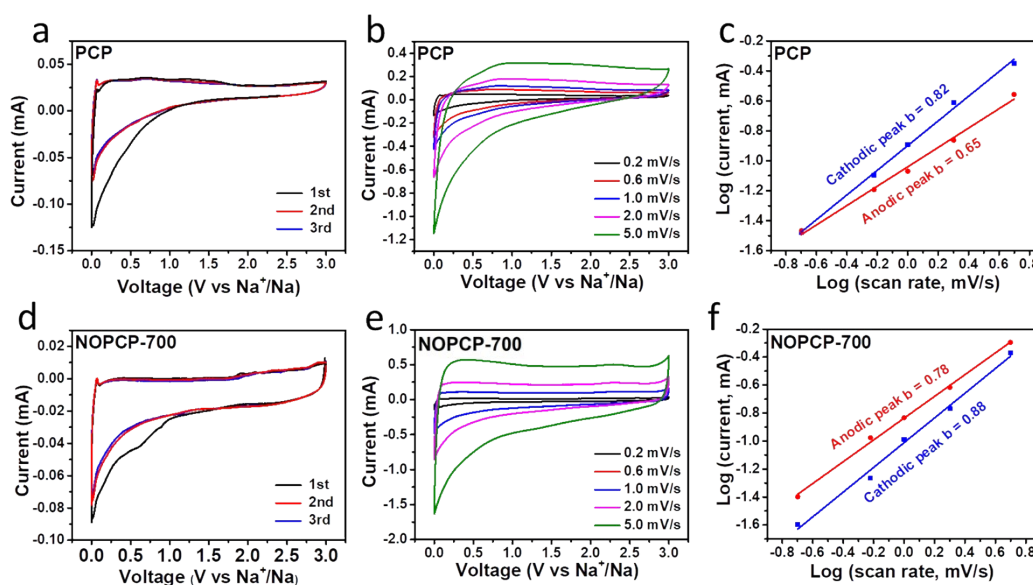

**Figure S15.** Electrochemical kinetic analysis of PCP and NOPCP-700 in SIBs (a and d) CV curves over a voltage range of 0.01-3.0 V at a scan rate of  $0.1 \text{ mV s}^{-1}$ , (b and e) CV curves at various scan rate, (c and f) the b-value determination for SIBs.

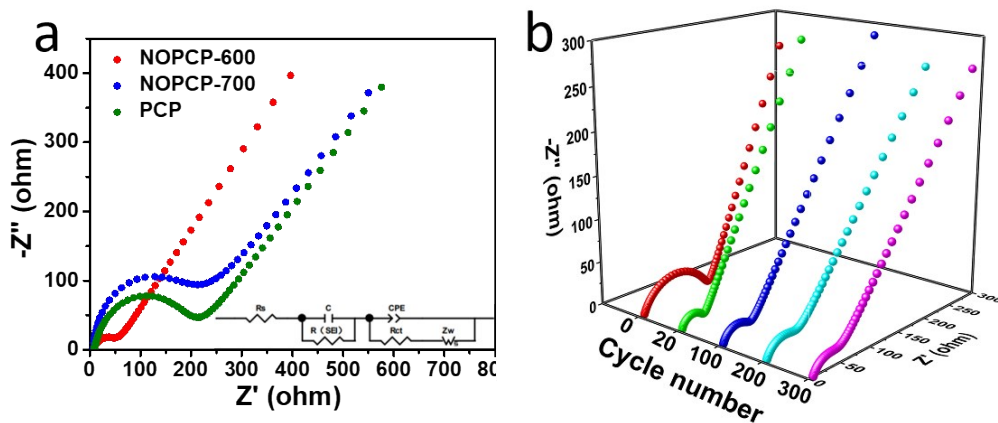

**Figure S16.** Nyquist plots of (a) NOPCP-600, NOPCP-700, PCP acquired at the 200th at a current density of  $500 \text{ mA g}^{-1}$  between 0.01 and 3 V for LIBs and (b) NOPCP-600 acquired at the 1th, 20th, 100th, 200th, and 300th cycles.

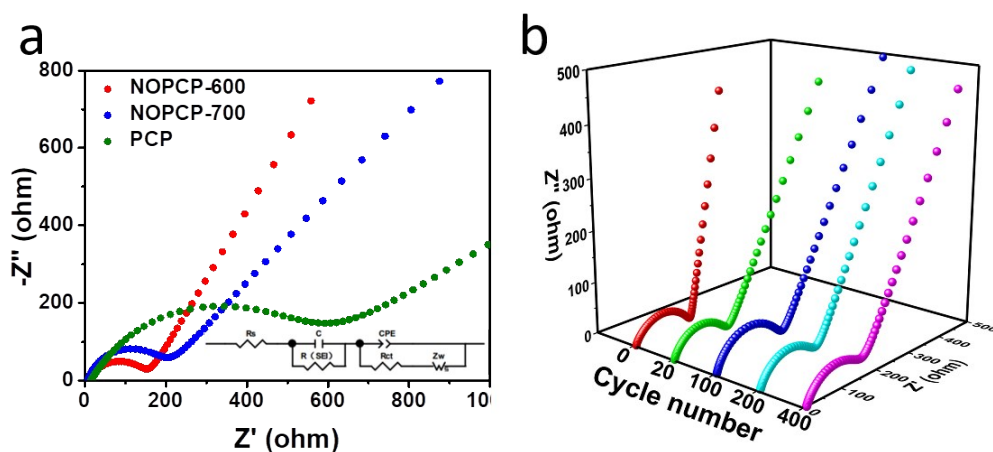

**Figure S17.** Nyquist plots of a) NOPCP-600, NOPCP-700, PCP acquired at the 200th at a current density of  $500 \text{ mA g}^{-1}$  between 0.01 and 3 V for SIBs and (b) NOPCP-600 acquired at the 1th, 20th, 100th, 200th, and 400th cycles.



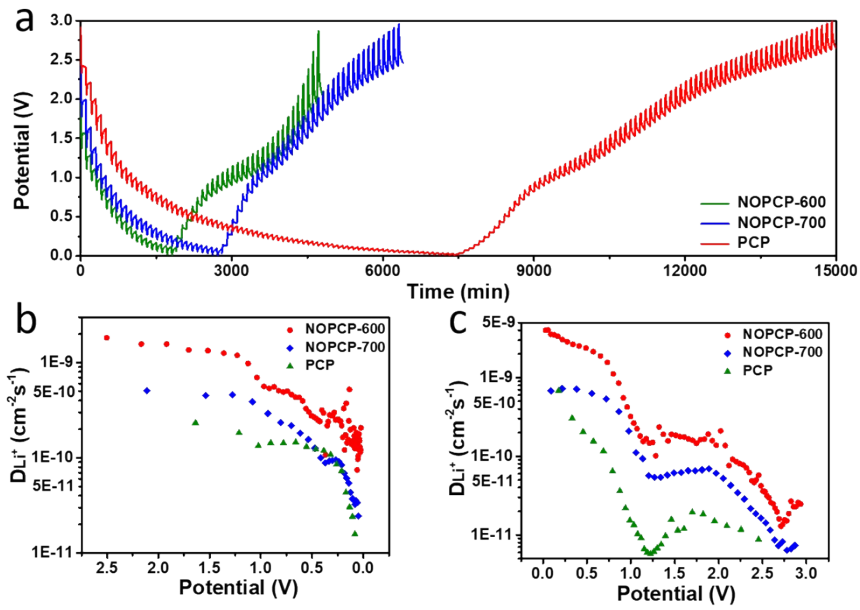

**Fig. S18** (a) GITT curves and (b and c) the corresponding Li<sup>+</sup> diffusion coefficient of NOPCP-600, NOPCP-700 and PCP electrodes in the discharge process and charge process.

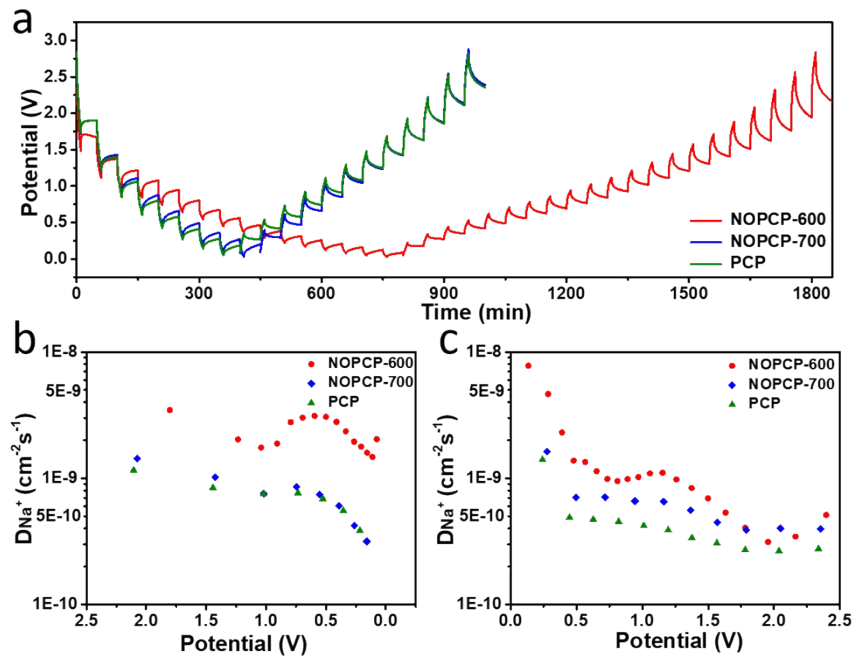

**Fig. S19** (a) GITT curves and (b and c) the corresponding Na<sup>+</sup> diffusion coefficient of NOPCP-600, NOPCP-700 and PCP electrodes in the discharge process and charge process.

**Table S1.** Comparison of the lithium-storage capacity of this work with the reported ones for carbon materials.

| Samples                         | Current density (mA g <sup>-1</sup> ) | Cycle number | initial coulombic efficiency     | Capacity (mAh g <sup>-1</sup> ) | Ref. |
|---------------------------------|---------------------------------------|--------------|----------------------------------|---------------------------------|------|
| N-doped carbon                  | 100                                   | 100          | 53.0%                            | 1870                            | S1   |
|                                 | 1000                                  | 100          | (100 mA g <sup>-1</sup> )        | 1150                            |      |
| N-doped grapheme-like carbon    | 50                                    | 200          | 50.3% (50 mA g <sup>-1</sup> )   | 1143                            | S2   |
| N-GCNs                          | 100                                   | 100          | 53.4% (100mA g <sup>-1</sup> )   | 1236                            | S3   |
| Porous carbon sheets            | 100                                   | 130          | 47.6%                            | 1467                            | S4   |
|                                 | 1000                                  | 2000         | (100 mA g <sup>-1</sup> )        | 710                             |      |
| Three-dimensional porous carbon | 100                                   | 150          | 64.9%                            | 941                             | S5   |
|                                 | 2000                                  | 1000         | (100 mA g <sup>-1</sup> )        | 469.2                           |      |
| N-doped carbon framework        | 1000                                  | 1000         | 64.99% (100 mA g <sup>-1</sup> ) | 596.1                           | S6   |
| MOF-derive N-doped carbon       | 1000                                  | 500          | 45.2% (1000 mA g <sup>-1</sup> ) | 609                             | S7   |
| NOPCP                           | 100                                   | 120          | 56.85%                           | 1663                            | This |

|  |      |      |                           |     |      |
|--|------|------|---------------------------|-----|------|
|  | 2000 | 1000 | (100 mA g <sup>-1</sup> ) | 667 | work |
|--|------|------|---------------------------|-----|------|

**Table S2.** Comparison of the sodium-storage capacity of this work with the reported one for carbon materials.

| Samples       | Current density (mA g <sup>-1</sup> ) | Cycle number | initial coulombic efficiency        | Capacity (mAh g <sup>-1</sup> ) | Ref.      |
|---------------|---------------------------------------|--------------|-------------------------------------|---------------------------------|-----------|
| HCONs-500     | 100                                   | 100          | 45%<br>(0.1A g <sup>-1</sup> )      | 262                             | S8        |
| HCNFs         | 100                                   | 450          | 70.4%<br>(0.1A g <sup>-1</sup> )    | 266                             | S9        |
|               | 1600                                  | 5000         |                                     | 85                              |           |
| PC-3          | 100                                   | 200          | 63.9%<br>(0.1A g <sup>-1</sup> )    | 310.4                           | S10       |
| NCNFs-IWNC800 | 100                                   | 350          | 57%<br>(0.1A g <sup>-1</sup> )      | 278                             | S11       |
|               | 10000                                 | 5000         |                                     | 148                             |           |
| N-HC          | 200                                   | 200          | 51.15%<br>(50 mA g <sup>-1</sup> )  | 214                             | S12       |
| 3DPC          | 50                                    | 100          | 40%<br>(50 mA g <sup>-1</sup> )     | 284                             | S13       |
| 3DHPCM        | 50                                    | 300          | 62.2%<br>(50 mA g <sup>-1</sup> )   | 281                             | S14       |
|               | 500                                   | 3000         |                                     | 175                             |           |
| NOHPHC        | 500                                   | 4000         | 32.6%<br>(500 mA g <sup>-1</sup> )  | 184                             | S15       |
| NOPCP         | 100                                   | 100          | 30.41%<br>(100 mA g <sup>-1</sup> ) | 313                             | This work |
|               | 1000                                  | 2000         |                                     | 228                             |           |

## References

- [1] J. Y. Jin, Z. W. Wang, R. Wang, J. L. Wang, Z. D. Huang, Y. W. Ma, H. Li, S. H. Wei, X. Huang, J. X. Yan, S. Z. Li and W. Huang, *Adv. Funct. Mater.*, 2019, **29**, 1807441.
- [2] Y. H. Tang, J. J. Chen, X. Wang, X. X. Wang, Y. Zhao, Z. Y. Mao and D. J.

- Wang, *Electrochimica Acta*, 2019, **324**, 134880.
- [3] S. F. Huang, Z. P. Li, B. Wang, J. J. Zhang, Z. Q. Peng, R. J. Qi, J. Wang and Y. F. Zhao, *Adv. Funct. Mater.*, 2018, **28**, 1706294.
- [4] F. Sun, K. F. Wang, L. J. Wang, T. Pei, J. H. Gao, G. B. Zhao and Y. F. Lu, *Carbon*, 2019, **155**, 166-175.
- [5] H. H. Wei, K. X. Liao, P. H. Shi, J. C. Fan, Q. J. Xu and Y. L. Min, *Nanoscale*, 2018, **10**, 15842-15853.
- [6] J. R. Wang, H. B. Fan, Y. M. Shen, C. P. Li and G. Wang, *Chem. Eng. J.*, 2019, **357**, 376-383.
- [7] X. G. Han, L. M. Sun, F. Wang and D. Sun, *J. Mater. Chem. A*, 2018, **6**, 18891-18897.
- [8] S. T. Liu, B. B. Yang, J. H. Zhou and H. H. Song, *J. Mater. Chem. A*, 2019, **7**, 18499-18509.
- [9] H. X. Han, X. Y. Chen, J. F. Qian, F. P. Zhong, X. M. Feng and W. H. Chen, X. P. Ai, H. X. Yang, Y. L. Cao, *Nanoscale*, 2019, **11**, 21999-22005.
- [10] Y. D. Zhu, Y. Huang, C. Chen, M. Y. Wang and P. B. Liu, *Electrochimica Acta*, 2019, **321**, 134698.
- [11] W. X. Zhao, X. Hu, S. Q. Ci, J. X. Chen, G. X. Wang, Q. H. Xu and Z. H. Wen, *Small*, 2019, **15**, 1904054.
- [12] X. D. Hu, X. H. Sun, S. J. Yoo, B. Evanko, F. Fan, S. Cai, C. M. Zheng, W. B. Hu and G. D. Stucky, *Nano Energy*, 2019, **56**, 828-839.
- [13] X. Y. Gao, G. Zhu, X. J. Zhang and T. Hu, *Micropor. Mesopor. Mat.*, 2019, **273**, 156-162.
- [14] J. Gong, G. Q. Zhao, J. K. Feng, G. L. Wang, Y. L. An, L. Zhang and B. Li, *ACS Appl. Mater. Interfaces*, 2019, **11**, 9125-9135.
- [15] M. Huang, B. J. Xi, Z. Y. Feng, J. Liu, J. K. Feng, Y. T. Qian and S. L. Xiong, *J. Mater. Chem. A*, 2018, **6**, 16465-16474.
